# Supplementary material for: The structure of gas-phase [Al·nH2O]+: hydrated monovalent aluminium Al+(H2O)n or hydride-hydroxide HAlOH+(H2O)n−1?
Source: Royal Society of Chemistry journal article supplement (doi:10.1039/c1cp00048a), 2011-01-01
Supplement: c1cp00048a.pdf [file c1cp00048a.pdf]

## **The Structure of Gas-Phase $[\text{Al},n\text{H}_2\text{O}]^+$ : Hydrated Monovalent Aluminium**

**$\text{Al}^+(\text{H}_2\text{O})_n$  or Hydride-Hydroxide  $\text{HAlOH}^+(\text{H}_2\text{O})_{n-1}$ ?**

**Christian van der Linde and Martin K. Beyer\***

Institut für Physikalische Chemie, Christian-Albrechts-Universität zu Kiel,

Olshausenstraße 40, 24098 Kiel, Germany

\* Tel. +49-431-880-2831; Fax +49-431-880-2830; E-mail [beyer@phc.uni-kiel.de](mailto:beyer@phc.uni-kiel.de).

Electronic Supplementary Information

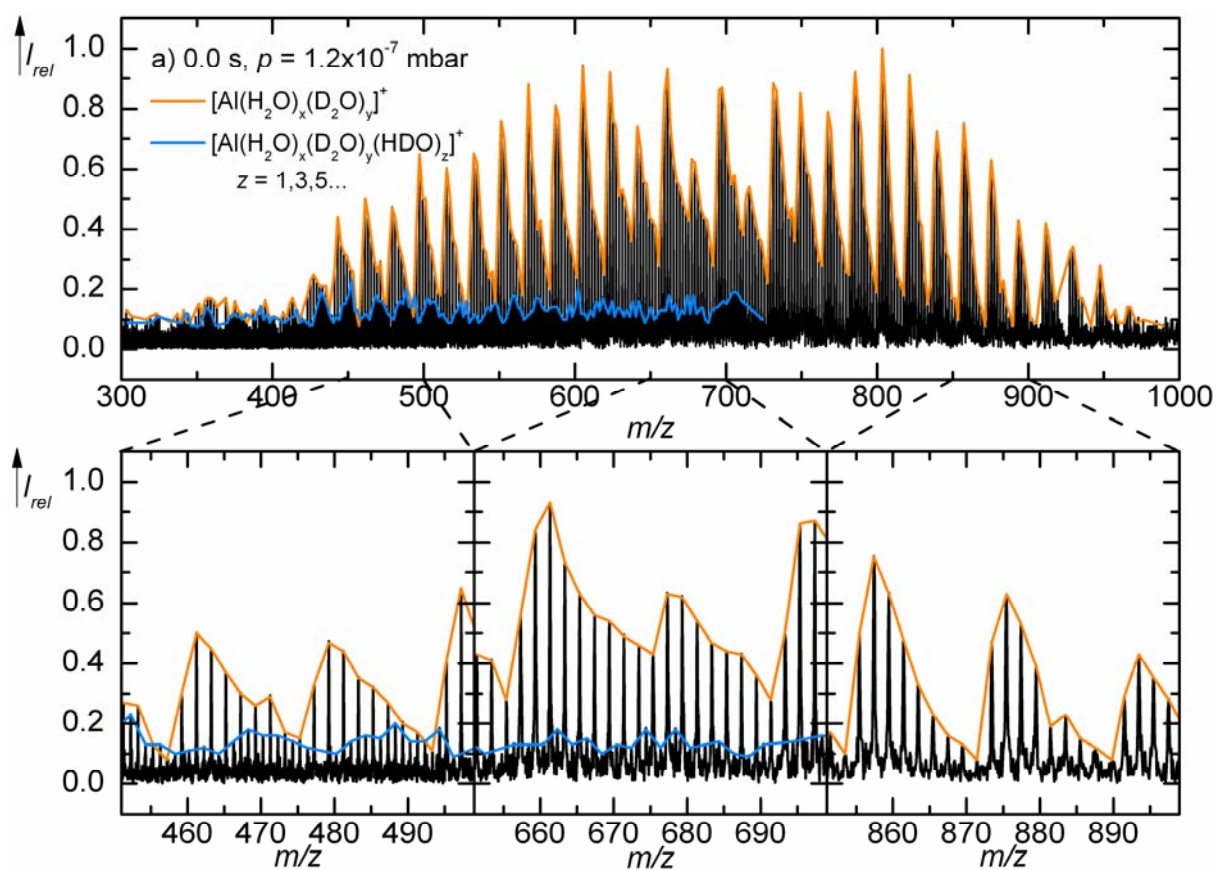

Figure S1. Mass spectra of the reaction of  $\text{Al}(\text{H}_2\text{O})_n^+$  with deuterium oxide at a calibrated pressure of  $1.2 \times 10^{-7}$  mbar after 0.0 s.

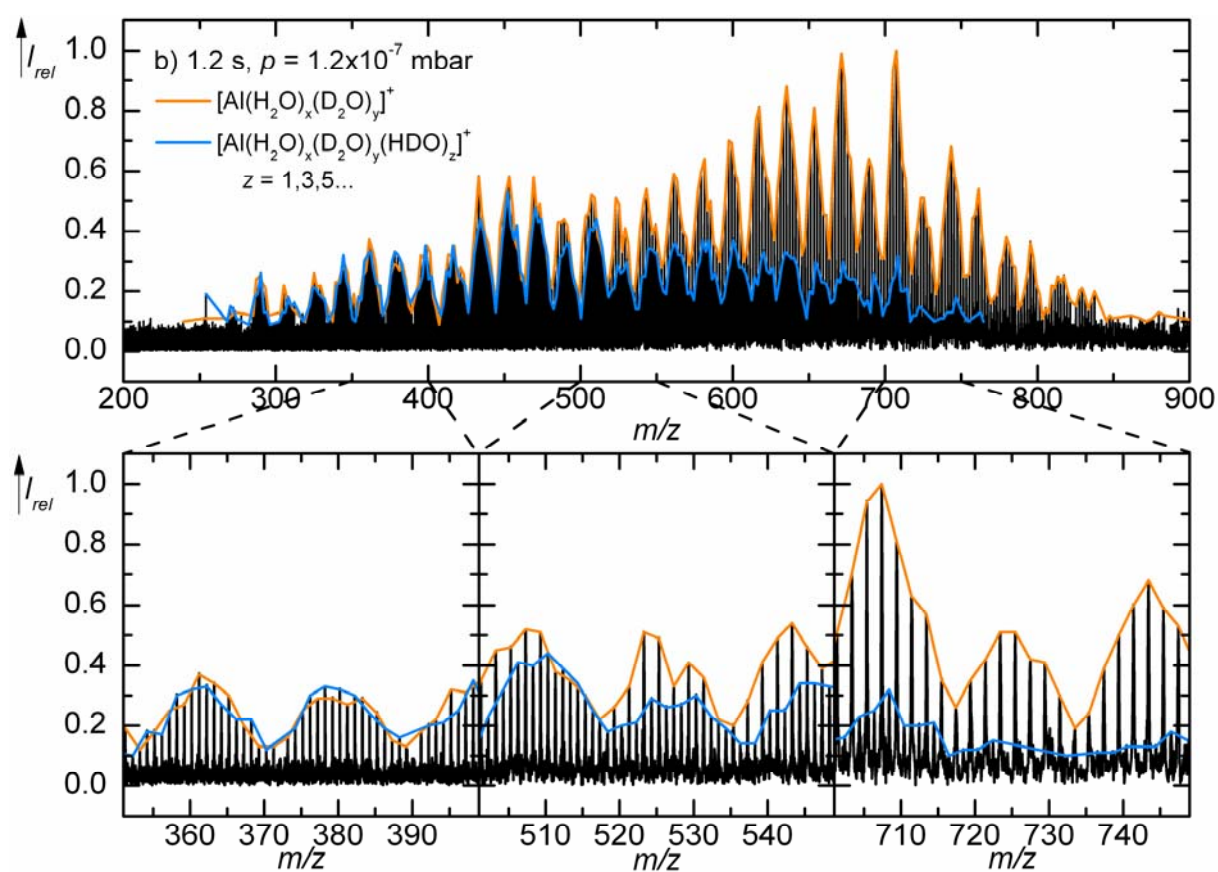

Figure S2. Mass spectra of the reaction of  $\text{Al}(\text{H}_2\text{O})_n^+$  with deuterium oxide at a calibrated pressure of  $1.2 \times 10^{-7}$  mbar after 1.2 s.

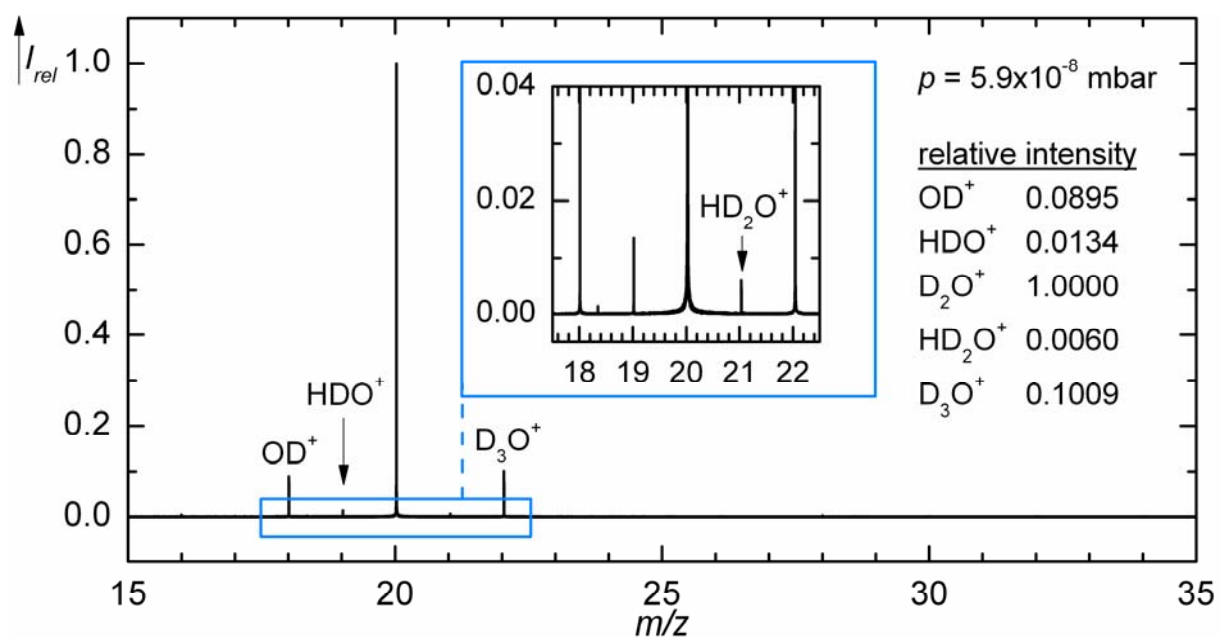

**Figure S3.** EI mass spectrum of the reaction gas deuterium oxide at a calibrated pressure of  $5.9 \times 10^{-8}$  mbar. The spectrum was taken directly after the described experiments.

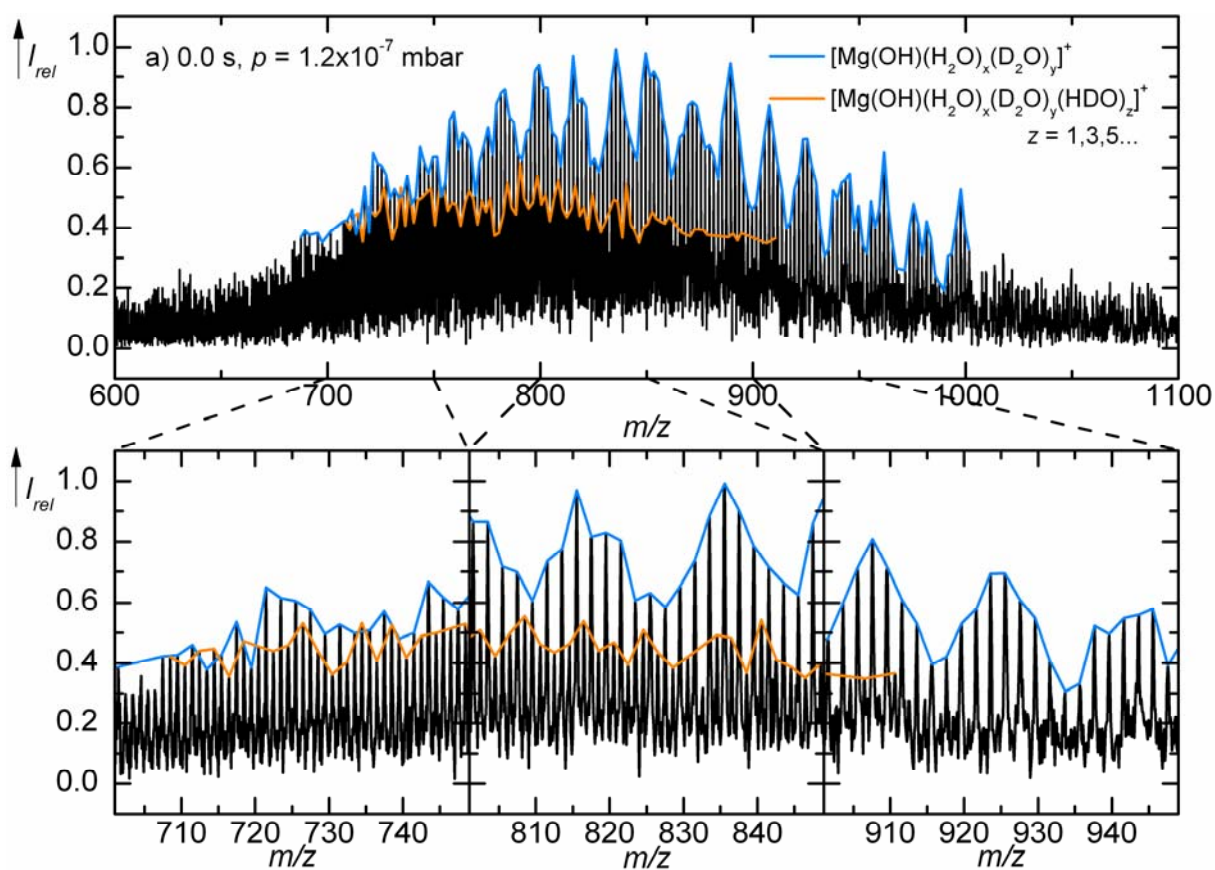

Figure S4. Mass spectra of the reaction of  $\text{Mg}(\text{OH})(\text{H}_2\text{O})_n^+$  with deuterium oxide at a calibrated pressure of  $1.2 \times 10^{-7}$  mbar after 0.0 s.

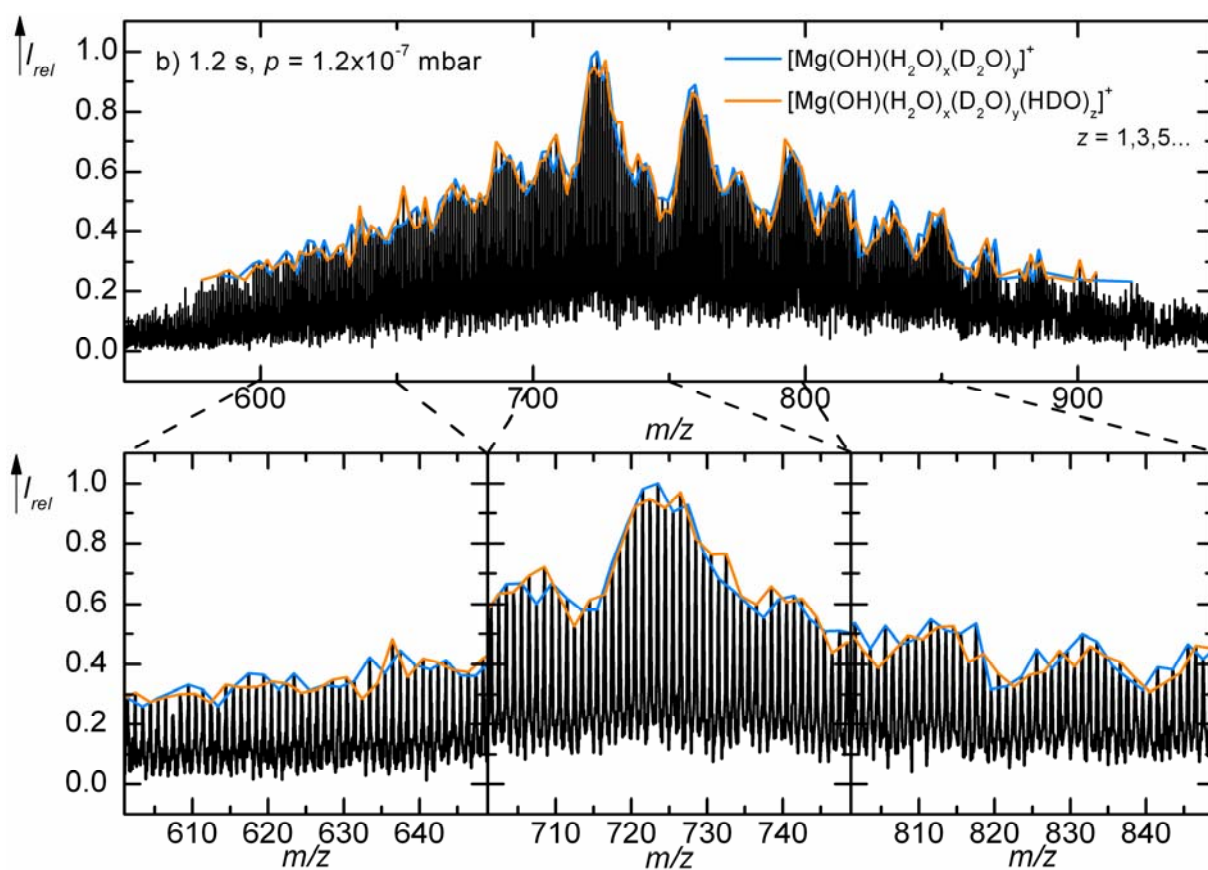

Figure S5. Mass spectra of the reaction of  $\text{Mg}(\text{OH})(\text{H}_2\text{O})_n^+$  with deuterium oxide at a calibrated pressure of  $1.2 \times 10^{-7}$  mbar after 1.2 s.
